# Supplementary material for: Ultrafast high energy supercapacitors based on pillared graphene nanostructures
Source: Royal Society of Chemistry journal article supplement (doi:10.1039/c5ta07615c), 2016-01-01
Supplement: c5ta07615c1.pdf [file c5ta07615c1.pdf]

Supporting Information for

# Ultrafast High Energy Supercapacitor based on Pillared Graphene Nanostructures

Wei Wang,<sup>a,b</sup> Mihrimah Ozkan<sup>b</sup> and Cengiz S. Ozkan<sup>\*a,b</sup>

Received (in XXX, XXX) Xth XXXXXXXXX 20XX, Accepted Xth XXXXXXXXX 20XX

DOI: 10.1039/b000000x

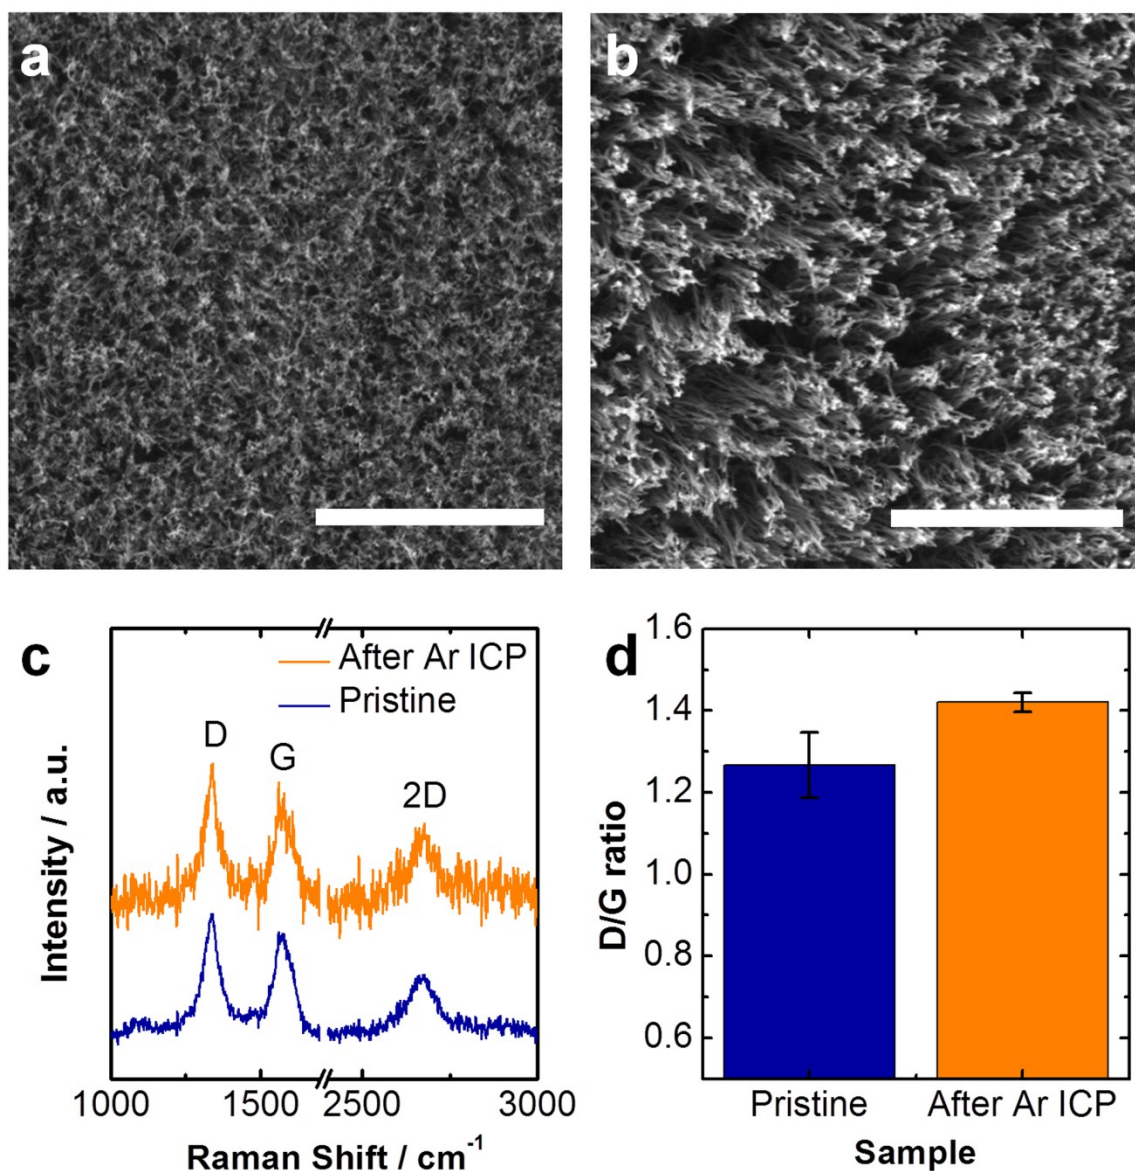

Fig. S1 (a) Top-view SEM image of PGN. (b) Top-view SEM image of Ar ICP treated PGN. (c) Raman spectra of PGN and Ar ICP treated PGN. (d) D/G ratio of PGN and Ar ICP treated PGN.

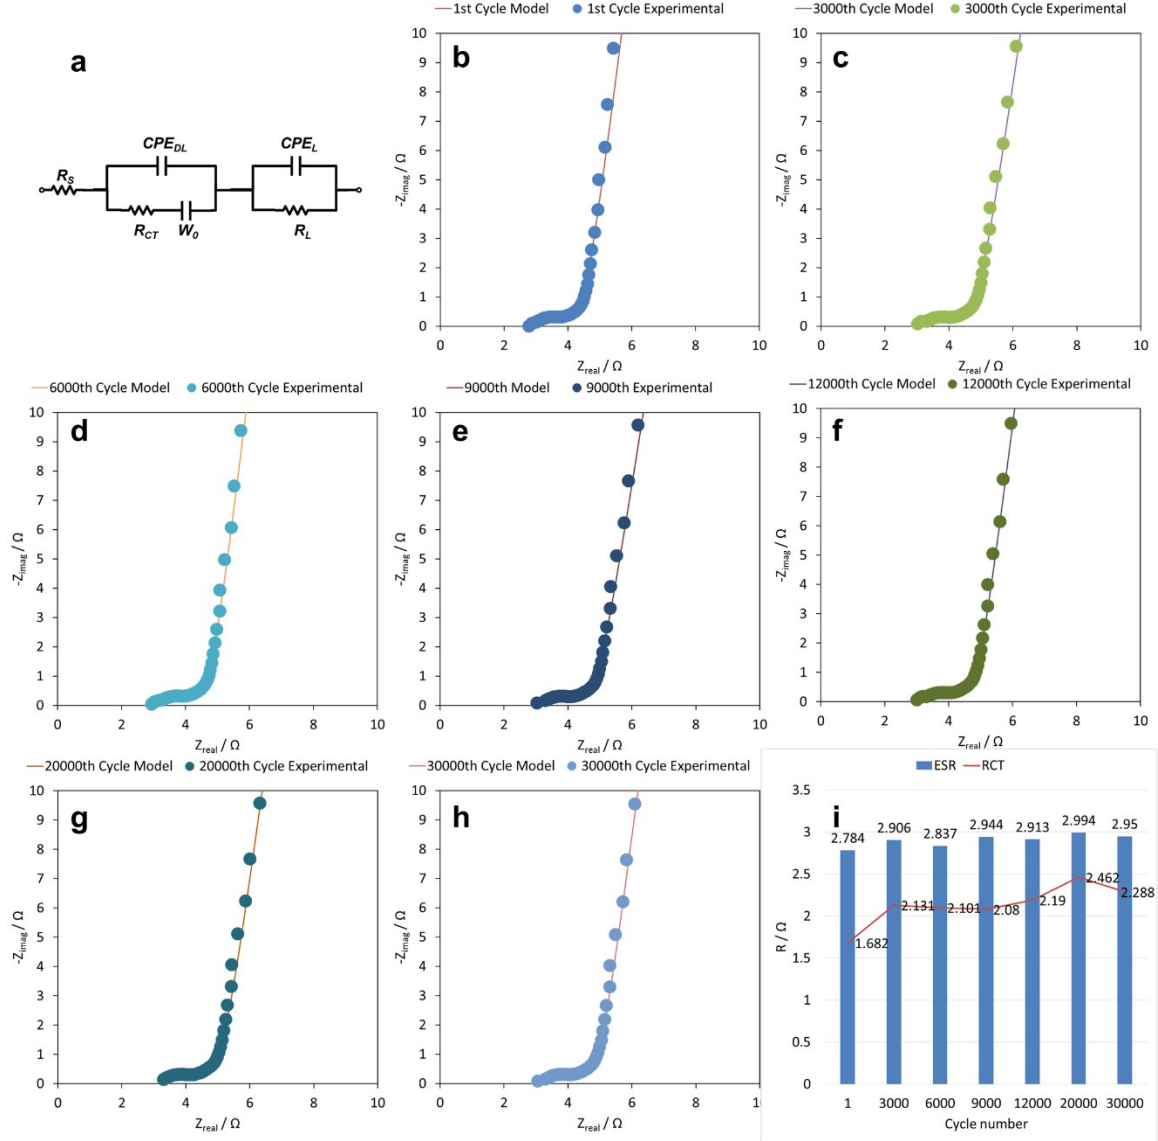

**Fig. S2** (a) The equivalent circuit of Randle's model, where  $R_s$  is the equivalent series resistance (ESR),  $R_{CT}$  is the resistance of the electrode-electrolyte,  $R_L$  is the leakage resistance.  $CPE_{DL}$  is the constant phase element (CPE) of double layer,  $W_0$  is the Warburg element,  $CPE_L$  is the mass capacitance. Experimental and modeled Nyquist plots for complex impedance for PGN based SC after (b-h) 1<sup>st</sup> cycle, 3000<sup>th</sup> cycle, 6000<sup>th</sup> cycle, 9000<sup>th</sup> cycle, 12000<sup>th</sup> cycle, 20000<sup>th</sup> cycle, and 30000<sup>th</sup> cycle. (i) Equivalent series resistance (ESR) and charge transfer resistance ( $R_{CT}$ ) as a function of cycling number.
